# Supplementary material
Source: publisher figshare collection journal article supplement (https://plos.figshare.com/articles/dataset/_/8119778)
Supplement: Supplementary file [file 1]

**S3 Table. Top identified cellular components.** Only the top scoring cellular components are described.

| GO                     | goName                             | DEGs | All Genes | pv_elim  |
|------------------------|------------------------------------|------|-----------|----------|
| <b><i>RA Early</i></b> |                                    |      |           |          |
| GO:0005615             | extracellular space                | 47   | 1090      | 5,90E-14 |
| GO:0070062             | extracellular exosome              | 48   | 2334      | 3,40E-07 |
| GO:0005604             | basement membrane                  | 10   | 85        | 0,000011 |
| GO:0005578             | proteinaceous extracellular matrix | 25   | 330       | 0,000051 |
| GO:0009986             | cell surface                       | 19   | 623       | 0,00013  |
| GO:0005581             | collagen trimer                    | 11   | 77        | 0,0004   |
| GO:0005783             | endoplasmic reticulum              | 32   | 1451      | 0,00456  |
| GO:0031012             | extracellular matrix               | 30   | 470       | 0,0068   |
| GO:0098552             | side of membrane                   | 10   | 361       | 0,02532  |
| <b><i>RA Late</i></b>  |                                    |      |           |          |
| GO:0005615             | extracellular space                | 22   | 1090      | 1,1E-06  |
| GO:0070062             | extracellular exosome              | 20   | 2338      | 0,0047   |
| GO:0044297             | cell body                          | 6    | 432       | 0,0163   |
| GO:0030017             | sarcomere                          | 5    | 168       | 0,0239   |
| GO:0000323             | lytic vacuole                      | 7    | 477       | 0,0665   |
| GO:0005764             | lysosome                           | 7    | 477       | 0,0665   |
| GO:0031012             | extracellular matrix               | 5    | 470       | 0,0715   |
| GO:0009986             | cell surface                       | 6    | 627       | 0,0758   |
| GO:0030016             | myofibril                          | 6    | 186       | 0,077    |
| <b><i>RV Early</i></b> |                                    |      |           |          |
| GO:0030018             | Z disc                             | 6    | 101       | 0,000008 |
| GO:0030017             | sarcomere                          | 11   | 168       | 0,0011   |

|                |                                    |    |      |          |
|----------------|------------------------------------|----|------|----------|
| GO:0015629     | actin cytoskeleton                 | 9  | 426  | 0,0055   |
| GO:0031674     | I band                             | 7  | 112  | 0,0468   |
| GO:0005615     | extracellular space                | 10 | 1090 | 0,0629   |
| GO:0030016     | myofibril                          | 12 | 186  | 0,0699   |
| GO:0031012     | extracellular matrix               | 5  | 470  | 0,0715   |
| GO:0005739     | mitochondrion                      | 11 | 1460 | 0,0806   |
| GO:0005924     | cell-substrate adherens junction   | 5  | 371  | 0,0927   |
| <b>RV Late</b> |                                    |    |      |          |
| GO:0005615     | extracellular space                | 47 | 1090 | 8,40E-18 |
| GO:0070062     | extracellular exosome              | 44 | 2338 | 3,00E-09 |
| GO:0005604     | basement membrane                  | 9  | 85   | 2,50E-07 |
| GO:0005578     | proteinaceous extracellular matrix | 24 | 330  | 0,000023 |
| GO:0031012     | extracellular matrix               | 30 | 470  | 0,00023  |
| GO:0005783     | endoplasmic reticulum              | 26 | 1452 | 0,00123  |
| GO:0030016     | myofibril                          | 10 | 186  | 0,00739  |
| GO:0031988     | membrane-bounded vesicle           | 55 | 3053 | 0,01229  |
| GO:0005581     | collagen trimer                    | 7  | 77   | 0,01716  |
