# Supplementary material
Source: publisher figshare collection journal article supplement (https://plos.figshare.com/articles/dataset/_/8119778)
Supplement: Supplementary file [file 1]

**S2 Table.** Top identified molecular functions. Only the top scoring functions are described in the table below.

| GO                     | goName                                      | DEGs | All Genes | pv_elim  |
|------------------------|---------------------------------------------|------|-----------|----------|
| <b><i>RA Early</i></b> |                                             |      |           |          |
| GO:0008201             | heparin binding                             | 13   | 144       | 3,10E-09 |
| GO:0001968             | fibronectin binding                         | 5    | 21        | 0,000002 |
| GO:0004252             | serine-type endopeptidase activity          | 10   | 145       | 2,7E-06  |
| GO:0005509             | calcium ion binding                         | 18   | 585       | 0,000035 |
| GO:0005201             | extracellular matrix structural constituent | 8    | 72        | 0,000073 |
| GO:0005178             | integrin binding                            | 7    | 105       | 0,00011  |
| GO:0005518             | collagen binding                            | 5    | 60        | 0,00299  |
| GO:0008083             | growth factor activity                      | 6    | 148       | 0,00447  |
| GO:0042803             | protein homodimerization activity           | 13   | 634       | 0,01476  |
| <b><i>RA Late</i></b>  |                                             |      |           |          |
| GO:0004252             | serine-type endopeptidase activity          | 7    | 145       | 5,9E-06  |
| GO:0008201             | heparin binding                             | 6    | 144       | 0,000065 |
| GO:0001968             | fibronectin binding                         | 3    | 21        | 0,00013  |
| GO:0043394             | proteoglycan binding                        | 3    | 29        | 0,00036  |
| GO:0008307             | structural constituent of muscle            | 3    | 39        | 0,00086  |
| GO:0008083             | growth factor activity                      | 4    | 148       | 0,00559  |
| GO:0005178             | integrin binding                            | 3    | 105       | 0,01409  |
| GO:0005509             | calcium ion binding                         | 7    | 585       | 0,0219   |
| GO:0042803             | protein homodimerization activity           | 7    | 635       | 0,03236  |
| <b><i>RV Early</i></b> |                                             |      |           |          |
| GO:0001968             | fibronectin binding                         | 3    | 21        | 0,00011  |
| GO:0008307             | structural constituent of muscle            | 3    | 39        | 0,00071  |

|                |                                             |    |     |          |
|----------------|---------------------------------------------|----|-----|----------|
| GO:0003779     | actin binding                               | 7  | 366 | 0,00125  |
| GO:0042805     | actinin binding                             | 3  | 28  | 0,00316  |
| GO:0005200     | structural constituent of cytoskeleton      | 3  | 87  | 0,00709  |
| GO:0044325     | ion channel binding                         | 3  | 105 | 0,01184  |
| GO:0008201     | heparin binding                             | 3  | 144 | 0,02721  |
| GO:0005518     | collagen binding                            | 3  | 60  | 0,02732  |
| GO:0008022     | protein C-terminus binding                  | 3  | 170 | 0,04139  |
| <b>RV Late</b> |                                             |    |     |          |
| GO:0008201     | heparin binding                             | 16 | 144 | 1,10E-14 |
| GO:0005201     | extracellular matrix structural constituent | 9  | 72  | 4,40E-08 |
| GO:0005509     | calcium ion binding                         | 19 | 585 | 7,00E-08 |
| GO:0005518     | collagen binding                            | 8  | 60  | 2,40E-07 |
| GO:0005178     | integrin binding                            | 6  | 105 | 0,00015  |
| GO:0004252     | serine-type endopeptidase activity          | 6  | 145 | 0,00082  |
| GO:0042802     | identical protein binding                   | 16 | 928 | 0,00163  |
| GO:0046983     | protein dimerization activity               | 12 | 962 | 0,06058  |
| GO:0050839     | cell adhesion molecule binding              | 11 | 423 | 0,07956  |
