# Supplementary material
Source: publisher figshare collection journal article supplement (https://plos.figshare.com/articles/dataset/_/8119778)
Supplement: Supplementary file [file 1]

**S1 Table. Top identified biological processes.** Only the top scoring biological processes are described.

| GO              | goName                                   | DEGs | All Genes | pv_elim  |
|-----------------|------------------------------------------|------|-----------|----------|
| <b>RA Early</b> |                                          |      |           |          |
| GO:0030198      | extracellular matrix organization        | 22   | 309       | 0,000075 |
| GO:0042493      | response to drug                         | 15   | 363       | 0,00025  |
| GO:0045087      | innate immune response                   | 21   | 592       | 0,00033  |
| GO:0006954      | inflammatory response                    | 19   | 553       | 0,00086  |
| GO:0043434      | response to peptide hormone              | 12   | 365       | 0,00366  |
| GO:0001525      | angiogenesis                             | 19   | 389       | 0,00483  |
| GO:0016477      | cell migration                           | 29   | 1086      | 0,0136   |
| GO:0009611      | response to wounding                     | 19   | 551       | 0,02461  |
| GO:0006936      | muscle contraction                       | 11   | 305       | 0,02823  |
| <b>RA Late</b>  |                                          |      |           |          |
| GO:0006958      | complement activation; classical pathway | 5    | 23        | 7,20E-08 |
| GO:0045087      | innate immune response                   | 14   | 592       | 0,00046  |
| GO:0009612      | response to mechanical stimulus          | 6    | 183       | 0,00239  |
| GO:0001525      | angiogenesis                             | 11   | 389       | 0,00273  |
| GO:0042493      | response to drug                         | 9    | 363       | 0,00273  |
| GO:0070371      | ERK1 and ERK2 cascade                    | 5    | 230       | 0,0051   |
| GO:0055114      | oxidation-reduction process              | 14   | 841       | 0,00604  |
| GO:0001666      | response to hypoxia                      | 6    | 258       | 0,00712  |
| GO:0032496      | response to lipopolysaccharide           | 5    | 265       | 0,0331   |
| <b>RV Early</b> |                                          |      |           |          |
| GO:0060048      | cardiac muscle contraction               | 4    | 107       | 0,00189  |
| GO:0007517      | muscle organ development                 | 8    | 324       | 0,00302  |

|                |                                                            |    |     |          |
|----------------|------------------------------------------------------------|----|-----|----------|
| GO:0050729     | positive regulation of inflammatory response               | 4  | 102 | 0,0126   |
| GO:0060047     | heart contraction                                          | 7  | 235 | 0,01848  |
| GO:0016042     | lipid catabolic process                                    | 4  | 258 | 0,03814  |
| GO:0006936     | muscle contraction                                         | 8  | 305 | 0,0472   |
| GO:0008016     | regulation of heart contraction                            | 5  | 208 | 0,05645  |
| GO:0030198     | extracellular matrix organization                          | 5  | 309 | 0,05988  |
| GO:0043062     | extracellular structure organization                       | 5  | 310 | 0,06046  |
| <b>RV Late</b> |                                                            |    |     |          |
| GO:0030574     | collagen catabolic process                                 | 7  | 61  | 7,7E-06  |
| GO:0009612     | response to mechanical stimulus                            | 10 | 183 | 0,000019 |
| GO:0071560     | cellular response to transforming growth factor b stimulus | 9  | 194 | 0,00027  |
| GO:0030198     | extracellular matrix organization                          | 20 | 309 | 0,00042  |
| GO:0042493     | response to drug                                           | 14 | 363 | 0,00057  |
| GO:0001666     | response to hypoxia                                        | 9  | 258 | 0,00102  |
| GO:0071356     | cellular response to tumor necrosis factor                 | 7  | 221 | 0,0022   |
| GO:0043434     | response to peptide hormone                                | 11 | 365 | 0,00227  |
| GO:0007507     | heart development                                          | 9  | 462 | 0,01317  |
